# Supplementary material for: Structural Stability Analysis in a Dynamic IS-LM-AS Macroeconomic Model with Inflation Expectations
Source: Hindawi journal article supplement (doi:10.1155/2022/5026061), 2022-10-22
Supplement: f1 [file 5026061.f1.pdf]

# Appendices

## Appendix A: Matlab Codes

### Appendix A.1: Case 1: Null Discriminant (3 real eigenvalues: 2 of them are repeated)

```
clc;
hold on
for r=0.103340423 % Initial value of the inflation rate
    for d=0.001325775 % Initial value of the instantaneous rate of change of the inflation rate
        for q=-0.00167909 % Initial value of the instantaneous rate of change of the real interest rate
            for ro=0.060669713 % Initial value of the real interest rate
                c=0.12; beta=0.21; g=3.99; theta=g/(1-c); h=0.15; epsilon=0.6; n=0; mhu=0.05; alpha=4*beta*(h+epsilon*theta)/(theta*(1-h*beta).^2);psi=1.1;
                delta=psi/(1-c);yop=1;pie=((theta*mhu-n*(h+epsilon*theta))/(theta);
                k2=((2*beta)*(r-pie)+(1-h*beta)*d)/((h+epsilon*theta)*(1+h*beta));
                k3=(-d*(1-h*beta).^2)/((2*beta)*(h+epsilon*theta)*(1+h*beta));
                k1=q+(n/theta)-k3-k2*(1-h*beta).^2/((2*beta)*(1+h*beta));
                k4=ro+k1/beta+(1-h*beta).^2/(2*beta).^2*(k2*((1-h*beta)/(1+h*beta)+1)+k3*(2*beta)/(1-h*beta));
                t=0:90;
            % Inflation rate
            x=(h+epsilon*theta)*(1+h*beta)*(k2*(t/(1-h*beta)+1/(2*beta))+k3/(1-h*beta)).*exp(((2*beta)/(h*beta-1))*t)+pie;
            % Rate of change of the inflation rate
            y=-((2*beta)*(h+epsilon*theta)*(1+h*beta))/((1-h*beta).^2)*(k2*t+k3).*exp(((2*beta)/(h*beta-1))*t);
            % Rate of change of the real rate of interest
            z=k1.*exp((-beta)*t)+(k2*((1-h*beta).^2/((2*beta)*(1+h*beta))+t)+k3).*exp(((2*beta)/(h*beta-1))*t)-(n/theta);
            % Real rate of interest
            w=k4-(k1/beta).*exp((-beta)*t)-(n/theta)*t-(1-h*beta)/(2*beta)*(k2*((1-h*beta).^2/((2*beta)*(1+h*beta))+1)-beta*(h-2*t))/(2*beta)+k3).*exp(((2*beta)/(h*beta-1))*t);
            % Real GDP (In levels)
            u=exp(delta-theta*(w));
            % Expected rate of inflation
            a=x-alpha*(log(u)-yop);
            figure (1)
            grid on
            subplot (3,2,1);
            plot (t, x,'linewidth',3)
            title ('Inflation rate')
            xlabel ('t'), ylabel ('\pi','rotation',360);
            hold on
            grid on
            subplot (3,2,2);
            plot (t, y,'linewidth',3)
            title ('Instantaneous rate of change of the inflation rate')
            xlabel ('t'), ylabel ('\pi\prime','rotation',360);
            hold on
            grid on
            subplot (3,2,3);
            plot (t, z,'linewidth',3)
            title ('Instantaneous rate of change of the real interest rate')
            xlabel ('t'), ylabel('r\prime','rotation',360);
            hold on
            grid on
            subplot (3,2,4);
            plot (t, w,'linewidth',3)
            title ('Real interest rate')
            xlabel ('t'), ylabel('r','rotation',360);
            hold on
            grid on
            subplot (3,2,5);
            plot (t, u,'linewidth',3)
            title ('Real GDP (In levels)')
            xlabel ('t'), ylabel ('Y','rotation',360)
            hold on
            grid on
            subplot (3,2,6)
            plot (t, a,'linewidth',3)
            title ('Expected inflation rate')
            xlabel ('t'), ylabel ('\pi^{\{e\}}','rotation',360)
            grid on
            hold on
            figure (2)
            f = @(t,x)[x(2);((-alpha*beta*theta)/(h+epsilon*theta))*x(1)+((alpha*theta*(h*beta-1))/(h+epsilon*theta))*x(2)+(alpha*beta*(mhu*theta-n*(h+epsilon*theta)))/(h+epsilon*theta);(beta)/(h+epsilon*theta))*x(1)+((1-h*beta)/(h+epsilon*theta))*x(2)-beta*x(3)-(beta*mhu)/(h+epsilon*theta)];
            [t,x]=ode45(f,0:0.25:90,[r; d; q]);
            x1= x (:,1);
            x2= x (:,2);
```

```

x3= x(:,3);
grid on
plot3 (x1, x2, x3,'-', 'Color','b','linewidth',3,'MarkerSize',6,'MarkerFaceColor','#D9FFFF'); grid on;
view (55,25)
hold on;
plot3 (r, d, q,'ko','linewidth',1,'MarkerFaceColor','k','MarkerSize',6); hold on;
plot3 (x1,0.002+0*x2, x3,'m:', 'linewidth',3,'MarkerFaceColor','r','MarkerSize',6),
plot3 (0.04+0*x1, x2, x3,'g:', 'linewidth',3,'MarkerFaceColor','r','MarkerSize',6),
plot3 (x1, x2, -0.002+0*x3,'r:', 'linewidth',3,'MarkerFaceColor','r','MarkerSize',6),
hold on
xlabel ('\pi');
ylabel ('\pi\prime');
zlabel ('r\prime',rotation',360);
title ('Phase portrait: IS-LM-AS model');
axis ([0.04 0.11 -0.009 0.002 -0.002 0.002]);
hold on;
figure (3)
grid on
subplot (3,3, [1,3])
plot (x1, x3,'m:', 'linewidth',3,'MarkerFaceColor','r','MarkerSize',6)
% title ('r\prime')
Xlabel ('r\prime'), ylabel ('\pi',rotation',360);
grid on
subplot (3,3,[4,6])
plot (x2, x3,'g:', 'linewidth',3,'MarkerFaceColor','r','MarkerSize',6),
% title ('Time-paths of the rate of change of the inflation rate')
Xlabel ('\pi\prime'), ylabel ('r\prime',rotation',360);
grid on
subplot (3,3, [7,9])
hold on
plot (x1, x2,'r:', 'linewidth',3,'MarkerFaceColor','r','MarkerSize',6),
% title ('Time-paths of the rate of change of the interest rate')
xlabel ('\pi'), ylabel ('\pi\prime',rotation',360);
grid on
hold on
% Comprobatation
figure (4)
grid on
subplot (3,3, [1,3])
plot (t, x1)
title ('Time-paths of the inflation rate')
xlabel ('t'), ylabel ('\pi',rotation',360);
grid on
subplot (3,3, [4,6])
plot (t, x2)
title ('Time-paths of the rate of change of the inflation rate')
xlabel ('t'), ylabel ('\pi\prime',rotation',360);
grid on
subplot (3,3, [7,9])
hold on
plot (t, x3)
title ('Time-paths of the rate of change of the interest rate')
xlabel ('t'), ylabel ('r\prime',rotation',360);
grid on
hold on
end
end
end
end
hold on
hold off

```

## Appendix A.2: Case 2: Positive Discriminant (3 real and different eigenvalues)

```

clc;
hold on
for r=0.199873255 % Initial value of the inflation rate
for d=-0.044686969 % Initial value of the instantaneous rate of change of the inflation rate
for q=0.027 % Initial value of the instantaneous rate of change of the real interest rate
for ro=0.0034487 % Initial value of the real interest rate
c=0.12; beta=0.25; g=3.99; theta=g/(1-c); h=0.01; epsilon=0.45; n=0; mhu=0.04; alpha=0.7; psi=1.1;
delta=psi/(1-c); yop=1;
pie=((theta*mhu-n*(h+epsilon*theta))/theta);
Discr=-alpha*theta*(4*beta*(h+epsilon*theta)-alpha*theta*(1-h*beta).^2);
lambda1=-beta;
lambda2=(-alpha*theta*(1-h*beta)+Discr^0.5)/(2*(h+epsilon*theta));
lambda3=(-alpha*theta*(1-h*beta)-Discr^0.5)/(2*(h+epsilon*theta));
k2=(r-pie)*((Discr^0.5+alpha*theta*(1+h*beta))/(h+epsilon*theta))+2*d*(1-h*lambda2)/((1-
h*lambda3)*(Discr^0.5+alpha*theta*(1+h*beta))+(1-h*lambda2)*(Discr^0.5-alpha*theta*(1+h*beta)));
k3=(k2*(Discr^0.5-alpha*theta*(1+h*beta))-2*d)/((Discr^0.5+alpha*theta*(1+h*beta)));
k1=q+(n/theta)-k3-k2;
k4=ro-k1/lambda1-k2/lambda2-k3/lambda3;
t=0:140;
% Inflation rate
x=k2*(h+epsilon*theta)*(1-h*lambda3).*exp(lambda2*t)+k3*(h+epsilon*theta)*(1-h*lambda2).*exp(lambda3*t)+pie;
% Instantaneous rate of change of the inflation rate
y=k2.*exp(lambda2*t)*(Discr^0.5-alpha*theta*(1+h*beta))/2-k3.*exp(lambda3*t)*(Discr^0.5+alpha*theta*(1+h*beta))/2;
% Instantaneous rate of change of the real rate of interest
z=k1.*exp(lambda1*t)+k2.*exp(lambda2*t)+k3.*exp(lambda3*t)-(n/theta);
% Real rate of interest
w=k4-(k1/beta).*exp(lambda1*t)-(n/theta)*t+(k2/lambda2).*exp(lambda2*t)+(k3/lambda3).*exp(lambda3*t);
% Real GDP (In levels)
u=exp(delta-theta*(w));
% Expected rate of inflation
a=x-alpha*(log(u)-yop);
figure (1)
grid on
subplot (3,2,1);
plot (t, x, 'linewidth',3)
title ('Inflation rate')
xlabel ('t'), ylabel ('\pi','rotation',360);
hold on
grid on
subplot (3,2,2);
plot (t, y, 'linewidth',3)
title ('Instantaneous rate of change of the inflation rate')
xlabel ('t'), ylabel ('\pi\prime','rotation',360);
hold on
grid on
subplot (3,2,3);
plot (t, z, 'linewidth',3)
title ('Instantaneous rate of change of the real interest rate')
xlabel ('t'), ylabel ('r\prime','rotation',360);
hold on
grid on
subplot (3,2,4);
plot (t, w, 'linewidth',3)
title ('Real interest rate')
xlabel ('t'), ylabel ('r','rotation',360);
hold on
grid on
subplot (3,2,5);
plot (t, u, 'linewidth',3)
title ('Real GDP (In levels)')
xlabel ('t'), ylabel ('Y','rotation',360)
hold on
grid on
subplot (3,2,6)
plot (t, a, 'linewidth',3)
title ('Expected inflation rate')
xlabel ('t'), ylabel ('\pi^e','rotation',360)
grid on
hold on
figure (2)
f = @(t,x)[x(2);(-alpha*beta*theta)/(h+epsilon*theta)*x(1)+((alpha*theta*(h*beta-
1))/(h+epsilon*theta))*x(2)+(alpha*beta*(mhu*theta-n*(h+epsilon*theta))/(h+epsilon*theta);(beta)/(h+epsilon*theta))*x(1)+((1-
h*beta)/(h+epsilon*theta))*x(2)-beta*x(3)-(beta*mhu)/(h+epsilon*theta)];
[t,x]=ode45(f,0:140,[r; d; q]);
x1=x(:,1);
x2=x(:,2);
x3=x(:,3);

```

```

grid on
plot3 (x1, x2, x3, '-', 'Color', 'b', 'linewidth', 3, 'MarkerSize', 6, 'MarkerFaceColor', '#D9FFFF'); grid on;
view (55,25)
hold on;
plot3 (r, d, q, 'ko', 'linewidth', 1, 'MarkerFaceColor', 'k', 'MarkerSize', 6); hold on;
plot3 (x1, 0*x2+0.005, x3, 'm', 'linewidth', 3, 'MarkerFaceColor', 'r', 'MarkerSize', 6),
plot3 (0.02+0*x1, x2, x3, 'g', 'linewidth', 3, 'MarkerFaceColor', 'r', 'MarkerSize', 6),
plot3 (x1, x2, -0.02+0*x3, 'r', 'linewidth', 3, 'MarkerFaceColor', 'r', 'MarkerSize', 6),
hold on
xlabel ('\pi');
ylabel ('\pi\prime');
zlabel ('r\prime', 'rotation', 360);
title ('Phase portrait: IS-LM-AS Model');
axis tight % ([0.02 0.2 -0.015 0.005 -0.02 0.05]);
hold on;
figure (3)
grid on
subplot (3,3, [1,3])
plot (x1, x3, 'm', 'linewidth', 3, 'MarkerFaceColor', 'r', 'MarkerSize', 6)
% title ('r\prime')
xlabel ('r\prime'), ylabel ('\pi', 'rotation', 360);
grid on
subplot (3,3, [4,6])
plot (x2, x3, 'g', 'linewidth', 3, 'MarkerFaceColor', 'r', 'MarkerSize', 6),
% title ('Time-paths of the rate of change of the inflation rate')
xlabel ('\pi\prime'), ylabel ('r\prime', 'rotation', 360);
grid on
subplot (3,3, [7,9])
hold on
plot (x1, x2, 'r', 'linewidth', 3, 'MarkerFaceColor', 'r', 'MarkerSize', 6),
% title ('Time-paths of the rate of change of the interest rate')
xlabel ('\pi'), ylabel ('\pi\prime', 'rotation', 360);
grid on
hold on
% Comprobatation
figure (4)
grid on
subplot (3,3, [1,3])
plot (t, x1)
title ('Time-paths of the inflation rate')
xlabel ('t'), ylabel ('\pi', 'rotation', 360);
grid on
subplot (3,3, [4,6])
plot (t, x2)
title ('Time-paths of the rate of change of the inflation rate')
xlabel ('t'), ylabel ('\pi\prime', 'rotation', 360);
grid on
subplot (3,3, [7,9])
hold on
plot (t, x3)
title ('Time-paths of the rate of change of the interest rate')
xlabel ('t'), ylabel ('r\prime', 'rotation', 360);
grid on
hold on
end
end
end
end
hold on
hold off

```

### Appendix A.3: Case 3: Negative Discriminant (1 real eigenvalue and 2 complex conjugated eigenvalues)

```

clc;
hold on
for r=0.1 % Initial value of the inflation rate
    for d=-0.001705909 % Initial value of the instantaneous rate of change of the inflation rate
        for q=-1.1017053 % Initial value of the instantaneous rate of change of the real interest rate
            for ro=0.203121033 % Initial value of the real interest rate
                alpha=0.9; c=0.03; betha=9; g=0.288; thetha=g/(1-c); h=0.1; epsilon=0.01; n=0; mhu=0.05; psi=1;
                delta=psi/(1-c); yop=1;
                pie=((thetha*mhu-n*(h+epsilon*thetha))/thetha);
                gamma=-(alpha*thetha*(1-h*betha))/(2*(h+epsilon*thetha));
                sigma=(alpha*thetha*(4*betha*(h+epsilon*thetha)-alpha*thetha*(1-h*betha).^2))^0.5/(2*(h+epsilon*thetha));
                k2=(r-pie)/(h+epsilon*thetha);
                k3=(d-gamma*(r-pie))/(h+epsilon*thetha)*sigma;
                Phi=((betha*(betha+gamma) + (1-h*betha)*(gamma*(betha+gamma)+sigma^2))*k2-
sigma*h*betha^2*k3)/((betha+gamma)^2+sigma^2);
                omega= ((betha*(betha+ gamma) + (1-
h*betha)*(gamma*(betha+gamma)+sigma^2))*k3+sigma*h*betha^2*k2)/((betha+gamma)^2+sigma^2);
                k1=q+(n/thetha)-Phi;
                k4=ro+k1/betha+(omega*sigma-Phi*gamma)/(gamma^2+sigma^2);
                t=0:1:30;
                % Inflation rate
                x=(h+epsilon*thetha)*(k2*cos(sigma*t)+k3*sin(sigma*t)).*exp(gamma*t)+pie;
                % Rate of change of the inflation rate
                y=(h+epsilon*thetha)*((sigma*k3+gamma*k2)*cos(sigma*t)-(sigma*k2-gamma*k3)*sin(sigma*t)).*exp(gamma*t);
                % Rate of change of the real rate of interest
                z=k1.*exp((-betha)*t)+(Phi*cos(sigma*t)+omega*sin(sigma*t)).*exp(gamma*t)-(n/thetha);
                % Real rate of interest
                w=k4-(k1/betha).*exp((-betha)*t)-(n/thetha)*t+(((Phi*gamma-
omega*sigma)*cos(sigma*t)+(Phi*sigma+omega*gamma)*sin(sigma*t))/(gamma^2+sigma^2)).*exp(gamma*t);
                % Real GDP (In levels)
                u=exp(delta-thetha*(w));
                % Expected rate of inflation
                a=x-alpha*(log(u)-yop);
                figure (1)
                grid on
                subplot (3,2,1);
                plot (t, x,'linewidth',3)
                title ('Inflation rate')
                xlabel ('t'), ylabel ('\pi','rotation',360);
                hold on
                grid on
                subplot (3,2,2);
                plot (t, y,'linewidth',3)
                title ('Instantaneous rate of change of the inflation rate')
                xlabel ('t'), ylabel ('\pi\prime','rotation',360);
                hold on
                grid on
                subplot (3,2,3);
                plot (t, z,'linewidth',3)
                title ('Instantaneous rate of change of the real interest rate')
                xlabel ('t'), ylabel ('r\prime','rotation',360);
                hold on
                grid on
                subplot (3,2,4);
                plot (t, w,'linewidth',3)
                title ('Real interest rate')
                xlabel ('t'), ylabel ('r','rotation',360);
                hold on
                grid on
                subplot (3,2,5);
                plot (t, u,'linewidth',3)
                title ('Real GDP (In levels)')
                xlabel ('t'), ylabel ('Y','rotation',360)
                hold on
                grid on
                subplot (3,2,6)
                plot (t, a,'linewidth',3)
                title ('Expected inflation rate')
                xlabel ('t'), ylabel ('\pi^{\{e\}}','rotation',360)
                grid on
                hold on
                figure (2)
                f = @(t,x)[x(2);((-alpha*betha*thetha)/(h+epsilon*thetha))*x(1)+((alpha*thetha*(h*betha-
1))/(h+epsilon*thetha))*x(2)+(alpha*betha*(mhu*thetha-n*(h+epsilon*thetha)))/(h+epsilon*thetha);((betha)/(h+epsilon*thetha))*x(1)+((1-
h*betha)/(h+epsilon*thetha))*x(2)-betha*x(3)-(betha*mhu)/(h+epsilon*thetha)];

```

```

[t,x]=ode45(f,0:1:30,[r; d; q]);
x1=x(:,1);
x2=x(:,2);
x3=x(:,3);
grid on
plot3 (x1, x2, x3,'-', 'Color','b','linewidth',3,'MarkerSize',6,'MarkerFaceColor','#D9FFFF'); grid on;
view (55,25)
hold on;
% set (gcf, 'color', 'b');
% set (gca, 'color', 'k');
plot3 (r, d, q, 'ko','linewidth',1,'MarkerFaceColor','k','MarkerSize',6); hold on;
plot3 (x1, 0.5+0*x2, x3, 'm','linewidth',3,'MarkerFaceColor','r','MarkerSize',6),
plot3 (0.12+0*x1, x2, x3, 'g','linewidth',3,'MarkerFaceColor','r','MarkerSize',6),
plot3 (x1, x2, -1.4+0*x3, 'r','linewidth',3,'MarkerFaceColor','r','MarkerSize',6),
hold on
xlabel ('\pi');
ylabel ('\pi\prime');
zlabel ('r\prime',rotation,360);
title ('Phase portrait: IS-LM-AS model');
axis ([0 0.12 -0.26 0.5 -1.4 0.5]);
hold on;
figure (3)
grid on
subplot (3,3, [1,3])
plot (x1, x3, 'm','linewidth',3,'MarkerFaceColor','r','MarkerSize',6)
% title ('r\prime')
xlabel ('r\prime'), ylabel ('\pi',rotation,360);
grid on
subplot (3,3, [4,6])
plot (x2, x3, 'g','linewidth',3,'MarkerFaceColor','r','MarkerSize',6)
% title ('Time-paths of the instantaneous rate of change of the inflation rate')
xlabel ('\pi\prime'), ylabel ('r\prime',rotation,360);
grid on
subplot (3,3, [7,9])
plot (x1, x2, 'r','linewidth',3,'MarkerFaceColor','r','MarkerSize',6),
% title ('Time-paths of the instantaneous rate of change of the interest rate')
xlabel ('\pi'), ylabel ('\pi\prime',rotation,360);
hold on
% Comprobaton
figure (4)
grid on
subplot (3,3, [1,3])
plot (t, x1)
title ('Time-paths of the inflation rate')
xlabel ('t'), ylabel ('\pi',rotation,360);
grid on
subplot (3,3, [4,6])
plot (t, x2)
title ('Time-paths of the rate of change of the inflation rate')
xlabel ('t'), ylabel ('\pi\prime',rotation,360);
grid on
subplot (3,3, [7,9])
plot (t, x3)
title ('Time-paths of the rate of change of the interest rate')
xlabel ('t'), ylabel ('r\prime',rotation,360);
grid on
hold on
end
end
end
end
hold on
hold off

```

## Appendix A.4: Degenerate Hopf Bifurcations

```

clc;
hold on
for r=0.1 % Initial value of the inflation rate
for d=0.005245478 % Initial value of the instantaneous rate of change of the inflation rate
for q=-1.107065273 % Initial value of the instantaneous rate of change of the real interest rate
for ro=0.198743521 % Initial value of the real interest rate
alpha=0.9; c=0.03; h=0.1; g=0.288; theta=g/(1-c); beta=1/h; epsilon=0.01; n=0; mhu=0.05; psi=1;
delta=psi/(1-c); yop=1;
pie=((theta*mhu-n*(h+epsilon*theta))/theta);
gamma=-(alpha*theta*(1-h*beta))/(2*(h+epsilon*theta));
Discr=-alpha*theta*(4*beta*(h+epsilon*theta)-alpha*theta*(1-h*beta).^2);
sigma=(-Discr)^0.5/(2*(h+epsilon*theta));
k2=(r-pie)/(h+epsilon*theta);
k3=(d-gamma*(r-pie))/((h+epsilon*theta)*sigma);
Phi=((beta*(beta+gamma)+(1-h*beta)*(gamma*(beta+gamma)+sigma^2))*k2-
sigma*h*beta^2*k3)/((beta+gamma)^2+sigma^2);
omega=((beta*(beta+gamma)+(1-
h*beta)*(gamma*(beta+gamma)+sigma^2))*k3+sigma*h*beta^2*k2)/((beta+gamma)^2+sigma^2);
k1=q+(n/theta)-Phi;
k4=ro+k1/beta+(omega*sigma-Phi*gamma)/(gamma^2+sigma^2);
t=0:140;
% Inflation rate
x=(h+epsilon*theta)*(k2*cos(sigma*t)+k3*sin(sigma*t)).*exp(gamma*t)+pie;
% Instantaneous rate of change of the inflation rate
y=(h+epsilon*theta)*((sigma*k3+gamma*k2)*cos(sigma*t)-(sigma*k2-gamma*k3)*sin(sigma*t)).*exp(gamma*t);
% Instantaneous rate of change of the real rate of interest
z=k1.*exp((-beta)*t)+(Phi*cos(sigma*t)+omega*sin(sigma*t)).*exp(gamma*t)-(n/theta);
% Real rate of interest
w=k4-(k1/beta).*exp((-beta)*t)-(n/theta)*t+(((Phi*gamma-
omega*sigma)*cos(sigma*t)+(Phi*sigma+omega*gamma)*sin(sigma*t))/(gamma^2+sigma^2)).*exp(gamma*t);
% Real GDP (In levels)
u=exp(delta-theta*(w));
% Expected rate of inflation
a=x-alpha*(log(u)-yop);
figure (1)
grid on
subplot (3,2,1);
plot (t, x,'linewidth',3)
title ('Inflation rate')
xlabel ('t'), ylabel ('\pi','rotation',360);
hold on
grid on
subplot (3,2,2);
plot (t, y,'linewidth',3)
title ('Instantaneous rate of change of the inflation rate')
xlabel ('t'), ylabel ('\pi\prime','rotation',360);
hold on
grid on
subplot (3,2,3);
plot (t, z,'linewidth',3)
title ('Instantaneous rate of change of the real interest rate')
xlabel ('t'), ylabel ('r\prime','rotation',360);
hold on
grid on
subplot (3,2,4);
plot (t, w,'linewidth',3)
title ('Real interest rate')
xlabel ('t'), ylabel ('r','rotation',360);
hold on
grid on
subplot (3,2,5);
plot (t, u,'linewidth',3)
title ('Real GDP (In levels)')
xlabel ('t'), ylabel ('Y','rotation',360)
hold on
grid on
subplot (3,2,6)
plot (t, a,'linewidth',3)
title ('Expected inflation rate')
xlabel ('t'), ylabel ('\pi^e','rotation',360)
grid on
hold on
figure (2)
f = @(t,x)[x(2);((-alpha*beta*theta)/(h+epsilon*theta))*x(1)+((alpha*theta*(h*beta-
1))/(h+epsilon*theta))*x(2)+(alpha*beta*(mhu*theta-n*(h+epsilon*theta)))/(h+epsilon*theta);(beta)/(h+epsilon*theta))*x(1)+((1-
h*beta)/(h+epsilon*theta))*x(2)-beta*x(3)-(beta*mhu)/(h+epsilon*theta)];
[t,x]=ode45(f,0:140,[r; d; q]);

```

```

x1=x(:,1);
x2=x(:,2);
x3=x(:,3);
grid on
plot3(x1, x2, x3,'b','Color','b','linewidth',3,'MarkerSize',6,'MarkerFaceColor','#D9FFFF'); grid on;
view(55,25)
hold on;
% set(gcf,'color','b');
% set(gca,'color','k');
plot3(r, d, q,'ko','linewidth',1,'MarkerFaceColor','k','MarkerSize',6); hold on;
plot3(pie,0,0,'ko','linewidth',1,'MarkerFaceColor','k','MarkerSize',6); hold on;
plot3(x1,0.3+0*x2, x3,'m','linewidth',3,'MarkerFaceColor','r','MarkerSize',6),
plot3(-0.01+0*x1, x2, x3,'g','linewidth',3,'MarkerFaceColor','r','MarkerSize',6),
plot3(x1, x2, -1.4+0*x3,'r','linewidth',3,'MarkerFaceColor','r','MarkerSize',6),
hold on
xlabel('\pi');
ylabel('\pi\prime');
zlabel('r\prime','rotation',360);
title('Phase portrait: IS-LM-AS model');
axis([-0.01 0.12 -0.3 0.3 -1.4 0.6]);
hold on;
figure(3)
grid on
subplot(3,3,[1,3])
plot(x1, x3,'m','linewidth',3,'MarkerFaceColor','r','MarkerSize',6)
% title('r\prime')
xlabel('r\prime'), ylabel('\pi','rotation',360);
grid on
subplot(3,3,[4,6])
plot(x2, x3,'g','linewidth',3,'MarkerFaceColor','r','MarkerSize',6)
% title('Time-paths of the rate of change of inflation rate')
xlabel('\pi\prime'), ylabel('r\prime','rotation',360);
grid on
subplot(3,3,[7,9])
plot(x1, x2,'r','linewidth',3,'MarkerFaceColor','r','MarkerSize',6),
% title('Time-paths of the rate of change of the interest rate')
xlabel('\pi'), ylabel('\pi\prime','rotation',360);
hold on
% Comprobaton
figure(4)
grid on
subplot(3,3,[1,3])
plot(t, x1)
title('Time-paths of the inflation rate')
xlabel('t'), ylabel('\pi','rotation',360);
grid on
subplot(3,3,[4,6])
plot(t, x2)
title('Time-paths of the rate of change of the inflation rate')
xlabel('t'), ylabel('\pi\prime','rotation',360);
grid on
subplot(3,3,[7,9])
plot(t, x3)
title('Time-paths of the rate of change of the interest rate')
xlabel('t'), ylabel('r\prime','rotation',360);
grid on
hold on
end
end
end
end
hold on
hold off

```
